# Supplementary material for: Acceleration of Biological Aging and Underestimation of Subjective Age Are Risk Factors for Severe COVID-19
Source: MDPI journal article supplement (doi:10.3390/biomedicines9080913), 2021-07-29
Supplement: s1 [file s1]

**Supplementary Table S1.** The number of cases, the severity of the disease and compliance with quarantine rules in the middle and end of 2020.

|                 | Mid-2020                       |    |      |    |    |                          | The End of 2020                |       |       |    |    |                          |
|-----------------|--------------------------------|----|------|----|----|--------------------------|--------------------------------|-------|-------|----|----|--------------------------|
|                 | COVID-19 severity (% in Group) |    |      |    |    | Соблюдени<br>е карантина | COVID-19 severity (% in Group) |       |       |    |    | Соблюдени<br>е карантина |
| Severity Groups | 0                              | 1  | 2    | 3  | 4  |                          | 0                              | 1     | 2     | 3  | 4  |                          |
| Working adults  | 99,6%                          | 0% | 0,4% | 0% | 0% | 2,3 <sup>\$</sup>        | 69%                            | 12.5% | 12,5% | 4% | 2% | 2,0 <sup>\$</sup>        |
| Risk group      | 100%                           | 0% | 0%   | 0% | 0% | 3,8 <sup>\$</sup>        | 100%                           | 0%    | 0%    | 0% | 0% | 3,5 <sup>\$</sup>        |

<sup>\$</sup> quarantine compliance scores
